# Supplementary material for: Ex vivo and in vivo T cell-depleted allogeneic stem cell transplantation in patients with acute myeloid leukemia in first complete remission resulted in similar overall survival: on behalf of the ALWP of the EBMT and the MSKCC
Source: PubMed Central journal article supplement (PMC6195954; doi:10.1186/s13045-018-0668-3), 2018-10-20
Supplement: 13045_2018_668_MOESM1_ESM.pdf [file 13045_2018_668_MOESM1_ESM.pdf]

List of EBMT contributing centers by decreasing number of patients enrolled in the study (N° preceding name is the EBMT center identification code):

|     |                                    |
|-----|------------------------------------|
| 230 | Marseille [Paoli Calmettes]        |
| 202 | Basel [202]                        |
| 267 | Pessac [H Haut-Leveque]            |
| 515 | Helsinki [Univ Central H]          |
| 926 | Montpellier [University]           |
| 650 | Angers [CHRU]                      |
| 209 | Leuven [Univ H]                    |
| 212 | Stockholm [Univ H]                 |
| 556 | Budapest [National Med Ctr]        |
| 661 | Rennes [H Sud/Pontchaillou]        |
| 251 | Caen [Hopital, Hemato]             |
| 253 | Nantes [Hotel Dieu]                |
| 277 | Lille [H Claude Huriez]            |
| 283 | Lund [Univ H]                      |
| 658 | Bergamo [Ospedale, emato]          |
| 207 | Paris [St Louis]                   |
| 810 | Freiburg [University]              |
| 160 | Paris [H Necker]                   |
| 289 | Goeteborg [Sahlgrenska Univ H]     |
| 614 | Hamburg [Univ H]                   |
| 676 | Vandoeuvre_Les_Nancy [H d'Enfants] |
| 726 | Liege [University]                 |
| 163 | Piacenza [Osp Civile]              |
| 225 | Turku [University]                 |
| 242 | Santander [Valdecilla]             |
| 246 | Rotterdam [Erasmus MC]             |
| 264 | Poitiers [H La Miletrie]           |
| 295 | Hannover [Medical Univ]            |
| 409 | Petach-Tikva [Beilinson H]         |
| 731 | Umeå [Univ H]                      |
| 746 | Tartu [Univ H]                     |
| 775 | Paris [St Antoine]                 |
| 785 | Homburg [Univ Saarland]            |
| 234 | Brussels [St. Luc]                 |
| 644 | Vilnius [Santariskiy Kl]           |
| 659 | Brest [C.H.R.U Brest]              |
| 705 | Udine [Univ H]                     |
| 161 | Tel_Aviv [Sourasky]                |
| 257 | Dublin [St James]                  |
| 270 | Grenoble [H A Michallon]           |
| 523 | Nice [H de l'ARCHET I]             |

|                                       |
|---------------------------------------|
| 610 Bratislava [Univ H]               |
| 656 Prague [Ist Hematology]           |
| 672 Strasbourg [H Hautepierre]        |
| 718 Pilsen [Charles Univ H]           |
| 996 Antwerp_Edegem [UZA]              |
| 208 Zürich [208]                      |
| 215 Brussels [Jules Bordet]           |
| 233 Besancon [H Jean Minjoz]          |
| 239 Utrecht [University]              |
| 240 Bologna [S Orsola-Malpighi]       |
| 248 Pescara [Osp Civile]              |
| 256 Kiel [UKSH]                       |
| 258 Jerusalem [Univ Hadassah]         |
| 261 Geneva [261]                      |
| 262 Paris [Pitie-Salpetriere]         |
| 266 Uppsala [Univ H]                  |
| 273 Clermont-Ferrand [Jean Perrin]    |
| 302 Zagreb [Univ H Rebro]             |
| 311 Wiesbaden [KI Diagnostik]         |
| 323 Murcia [V Arrixaca]               |
| 369 Beirut [American Univ]            |
| 389 Leipzig [Univ, Haemat/Oncol]      |
| 397 Riyadh [King Faisal]              |
| 539 London [St George's]              |
| 565 Maastricht [Univ H]               |
| 574 Olomouc [Univ H]                  |
| 589 Adana [Baskent Univ]              |
| 597 Brno [Univ H]                     |
| 606 Cuneo [S Croce e Carle]           |
| 623 Verona [Policlinico]              |
| 624 Toulouse [H Purpan]               |
| 640 Ljubljana [Univ Med Ctr]          |
| 645 Marburg [Philipps Univ]           |
| 652 Tricase_(Lecce) [C Panico]        |
| 666 Villejuif [Gustave Roussy]        |
| 729 Hradec_Králové [Charles U H, Hem] |
| 740 Linköping [Univ H]                |
| 754 Tel-Hashomer [Univ Adults]        |
| 759 Barcelona [H Univ Bellvitge]      |
| 792 Catania [Osp Ferrarotto]          |
| 807 Berlin [Charité Univ]             |
| 941 Rouen [Becquerel]                 |
| 977 Limoges [CHRU]                    |
